# Supplementary material for: RELEASE: a protocol for a systematic review based, individual participant data, meta- and network meta-analysis, of complex speech-language therapy interventions for stroke-related aphasia
Source: PubMed Central journal article supplement — Aphasiology. Author manuscript; Available in PMC 2023 Aug 9. (PMC7614912; doi:10.1080/02687038.2019.1643003), 2020-02
Supplement: EMS151068-supplement-Appendix.pdf [file EMS151068-supplement-Appendix.pdf]

## Appendix 1. MEDLINE search strategy

### MEDLINE (Ovid) from 1946 to 22 September 2015

1. exp aphasia/
2. language disorders/or speech disorders/or anomia/
3. (aphasi\$ or dysphasi\$ or anomia or anomic).tw.
4. ((speech or language\$ or linguistic or communicat\$) adj5 (disorder\$ or impair\$ or problem\$ or dysfunction or difficult\$)).tw.
5. 1 or 2 or 3 or 4
6. exp aphasia/rh, th or language disorders/rh, th or speech disorders/rh, th or anomia/rh, th
7. speech-language pathology/or exp "rehabilitation of speech and language disorders"/
8. ((speech or language\$ or linguistic or aphasi\$ or dysphasi\$ or anomia or anomic) adj5 (therap\$ or train\$ or rehabilitat\$ or treat\$ or remediat\$ or intervention\$ or pathol\$)).tw.
9. (SLT or SLP).tw.
10. (melodic intonation therap\$ or MIT).tw.
11. 6 or 7 or 8 or 9 or 10
12. Randomized Controlled Trials as Topic/
13. random allocation/
14. Controlled Clinical Trials as Topic/
15. control groups/
16. clinical trials as topic/or clinical trials, phase i as topic/or clinical trials, phase ii as topic/or clinical trials, phase iii as topic/or clinical trials, phase iv as topic/
17. double-blind method/
18. single-blind method/
19. Placebos/
20. placebo effect/
21. cross-over studies/

22. randomized controlled trial.pt.
23. controlled clinical trial.pt.
24. (clinical trial or clinical trial phase i or clinical trial phase ii or clinical trial phase iii or clinical trial phase iv).pt.
25. (random\$ or RCT or RCTs).tw.
26. (controlled adj5 (trial\$ or stud\$)).tw.
27. (clinical\$ adj5 trial\$).tw.
28. ((control or treatment or experiment\$ or intervention) adj5 (group\$ or subject\$ or patient\$)).tw.
29. (quasi-random\$ or quasi random\$ or pseudo-random\$ or pseudo random\$).tw.
30. ((control or experiment\$ or conservative) adj5 (treatment or therapy or procedure or manage\$)).tw.
31. ((singl\$ or doubl\$ or tripl\$ or trebl\$) adj5 (blind\$ or mask\$)).tw.
32. (cross-over or cross over or crossover).tw.
33. (placebo\$ or sham).tw.
34. trial.ti.
35. (assign\$ or allocat\$).tw.
36. controls.tw.
37. or/12-36
38. 5 and 11 and 37
39. exp animals/not humans.sh.
40. 38 not 39
41. (pediatric or paediatric or infant or infants or child or children\$ or childhood or neonat\$ or juvenile\$ or toddler\$).ti.
42. (child/or child, preschool/or adult children/or adolescent/or exp infant/) not exp adult/
43. 41 or 42
44. 40 not 43
40. 36 not 39
